# Supplementary material for: Chemical Constituent Analysis of Ranunculus sceleratus L. Using Ultra-High-Performance Liquid Chromatography Coupled with Quadrupole-Orbitrap High-Resolution Mass Spectrometry
Source: MDPI journal article supplement (doi:10.3390/molecules27103299), 2022-05-20
Supplement: s1 [file s1]

- Supplementary Material -

Chemical Constituent Analysis of *Ranunculus sceleratus* L. Using Ultra-High-Performance Liquid Chromatography Coupled with Quadrupole-Orbitrap High-Resolution Mass Spectrometry

Shanshan Cao <sup>1</sup>, Min Hu <sup>1</sup>, Lingli Yang <sup>1</sup>, Meiqin Li <sup>1</sup>, Zhen Shi <sup>1</sup>, Wenming Cheng <sup>1,\*</sup>, Yazhong Zhang <sup>2</sup>, Fei Chen <sup>1</sup>, Sheng Wang <sup>3</sup> and Qunlin Zhang <sup>1,\*</sup>

<sup>1</sup> School of Pharmacy, Anhui Medical University, Hefei 230032, China; 1555455280@163.com (S.C.); minhu3597@163.com (M.H.); 15850658857@163.com (L.Y.); lmq2860735640@163.com (M.L.); 18269712818@163.com (Z.S.); 17555801160@139.com (F.C).

<sup>2</sup> Anhui Institute for Food and Drug Control, Hefei 230051, China; 13956985695@139.com (Y.Z.)

<sup>3</sup> The Center for Scientific Research of Anhui Medical University, Hefei 230032, China; wangsheng\_cpu@163.com (S.W.)

\* Correspondence: chengwm@ahmu.edu.cn (W. C.); qlzhang@ahmu.edu.cn (Q. Z.)

Table of Contents

Figure S1: Product ion spectra of standard samples of isoscopoletin (A), scopoletin (B) and scoparone (C) in positive ionization mode.

Figure S2: Product ion spectra of standard samples of protocatechuic acid (A), aesculetin (B), caffeic acid (C), ferulic acid (D), salicylic acid (E), luteolin (F), quercetin (G), emodin (H) and oleanic acid (I) in negative ionization mode.

Figure S3:  
Chemical structures of 69 compounds identified in the 80% methanol extract of RS.

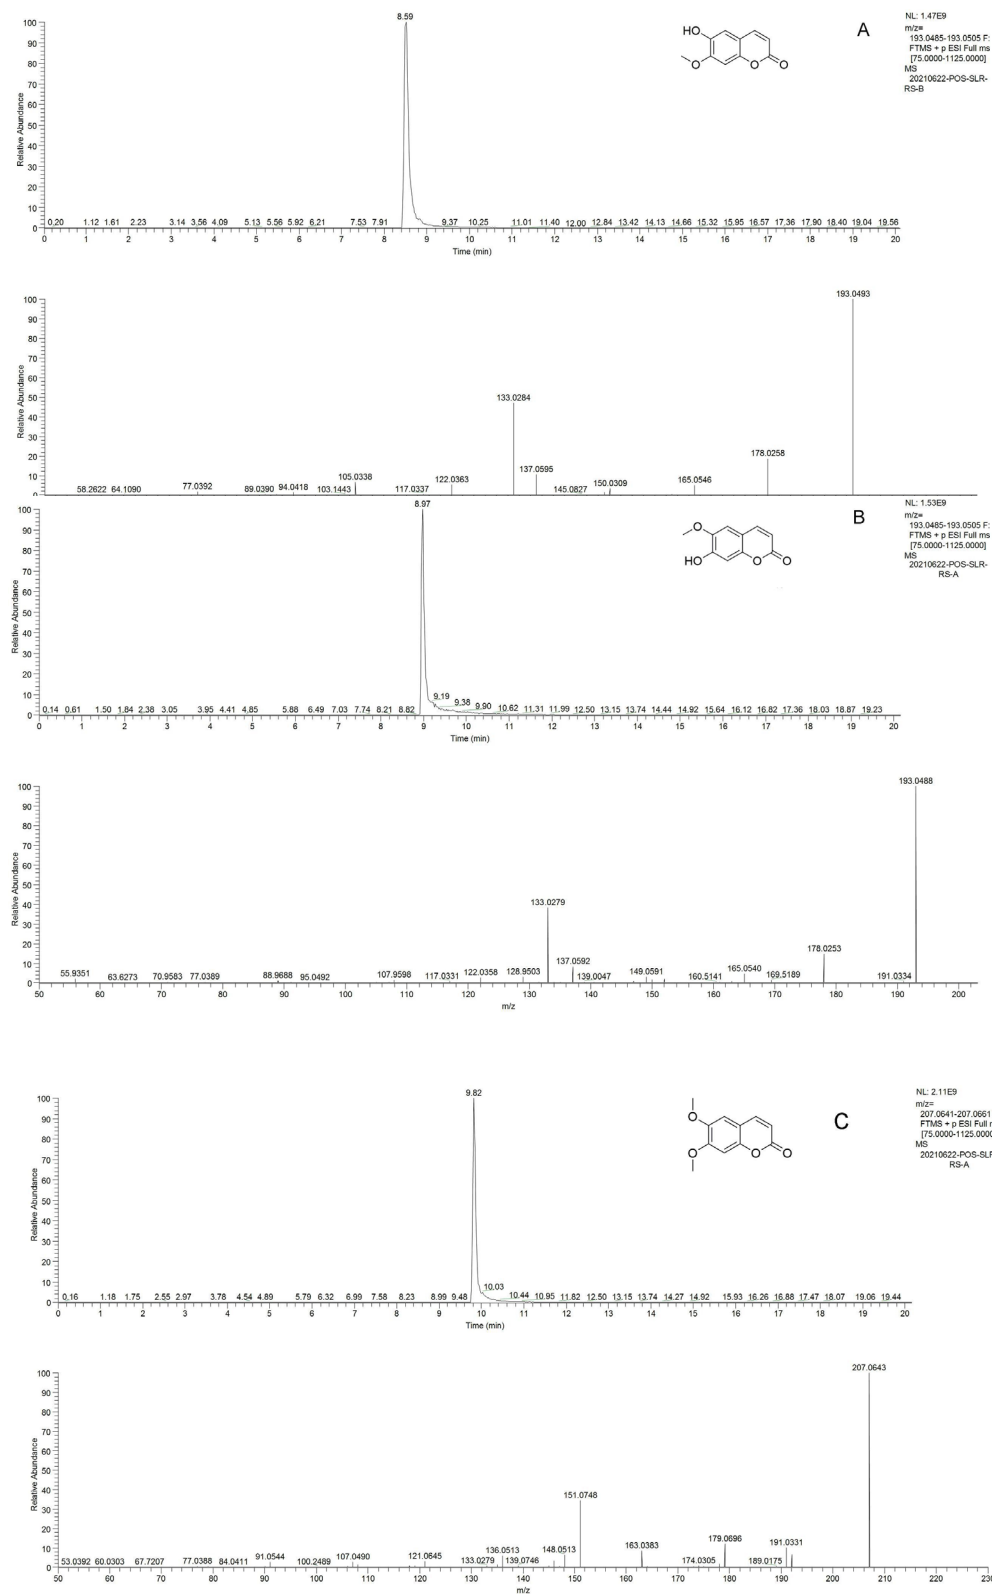

**Figure S1.** Product ion spectra of standard samples of isoscopoletin (A), scopoletin (B) and scoparone (C) in positive ionization mode.

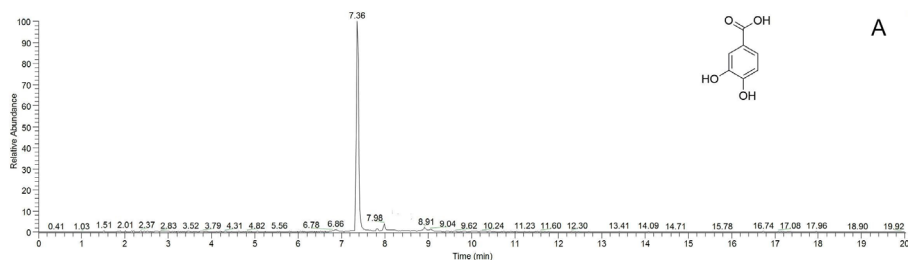

NL: 1.33E7  
Base Peak m/z= 153.0181-153.0185 F:  
FTMS - p ESI Full ms  
[75.0000-1125.0000] MS  
20210622-NEG-SLR-RS-B

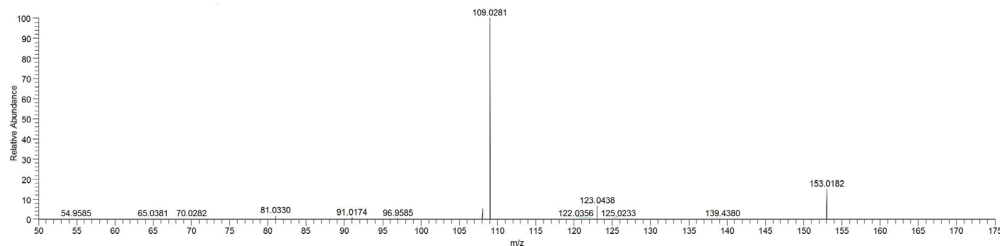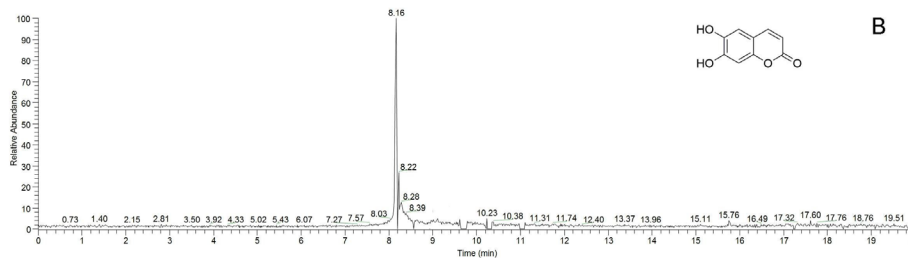

NL: 1.66E6  
m/z= 177.0173-177.0191 F:  
FTMS - p ESI Full ms  
[75.0000-1125.0000] MS  
20210622-NEG-SLR-RS-A

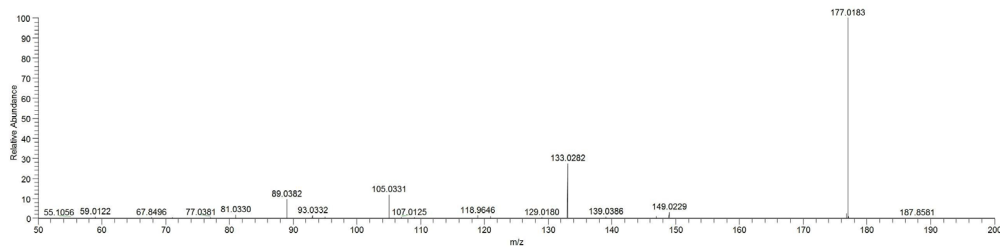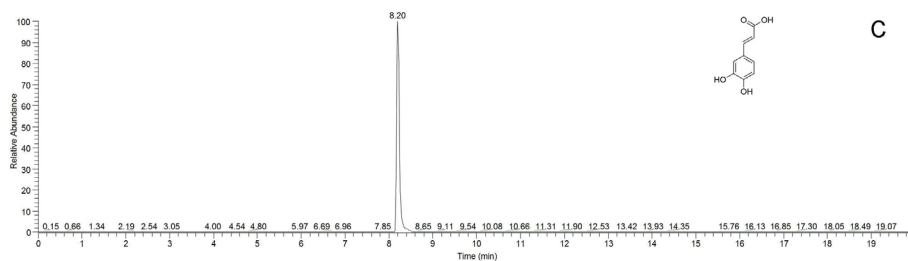

NL: 2.37E9  
m/z= 179.0330-179.0348 F:  
FTMS - p ESI Full ms  
[75.0000-1125.0000] MS  
20210622-NEG-SLR-RS-A

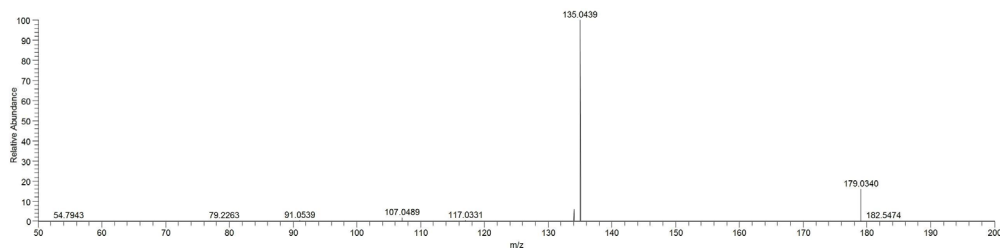

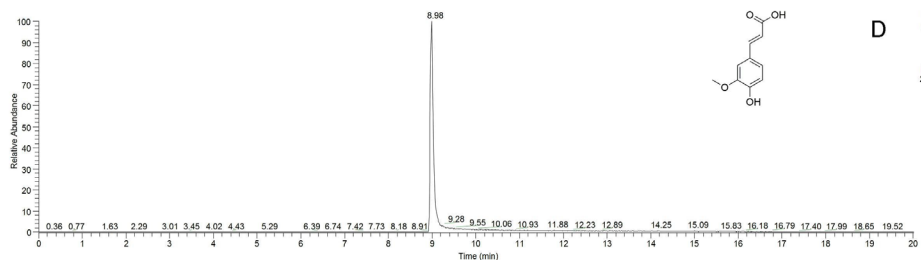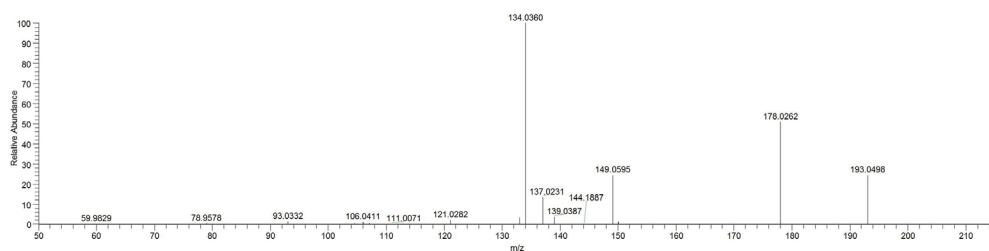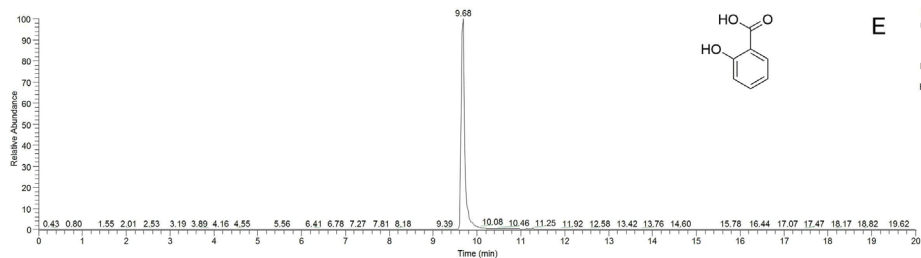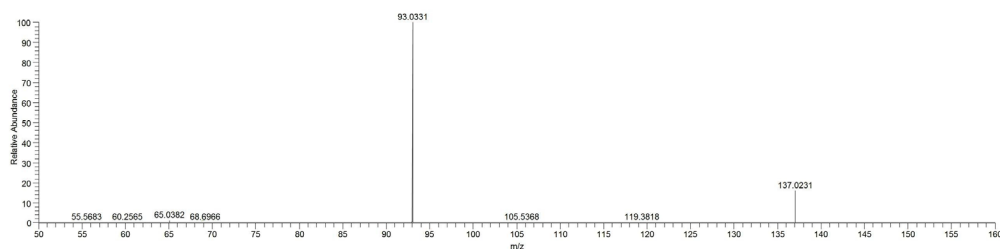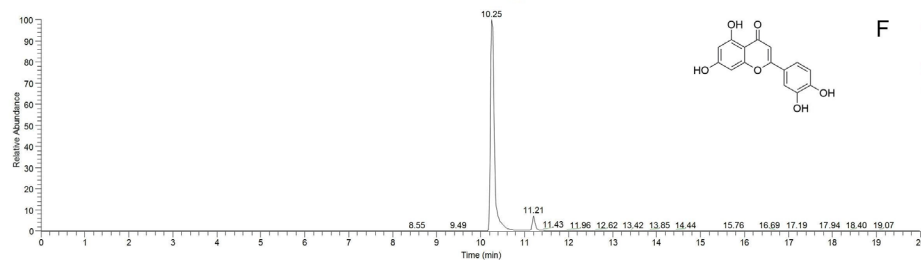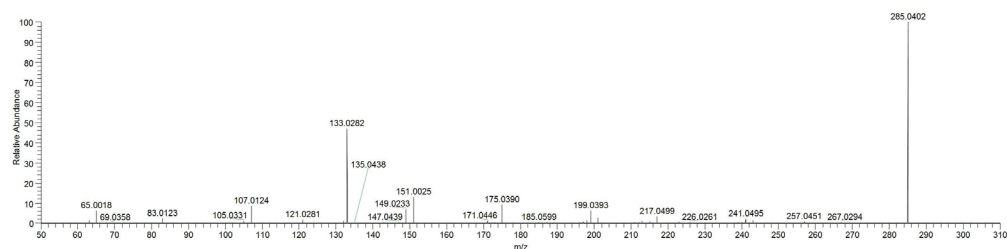

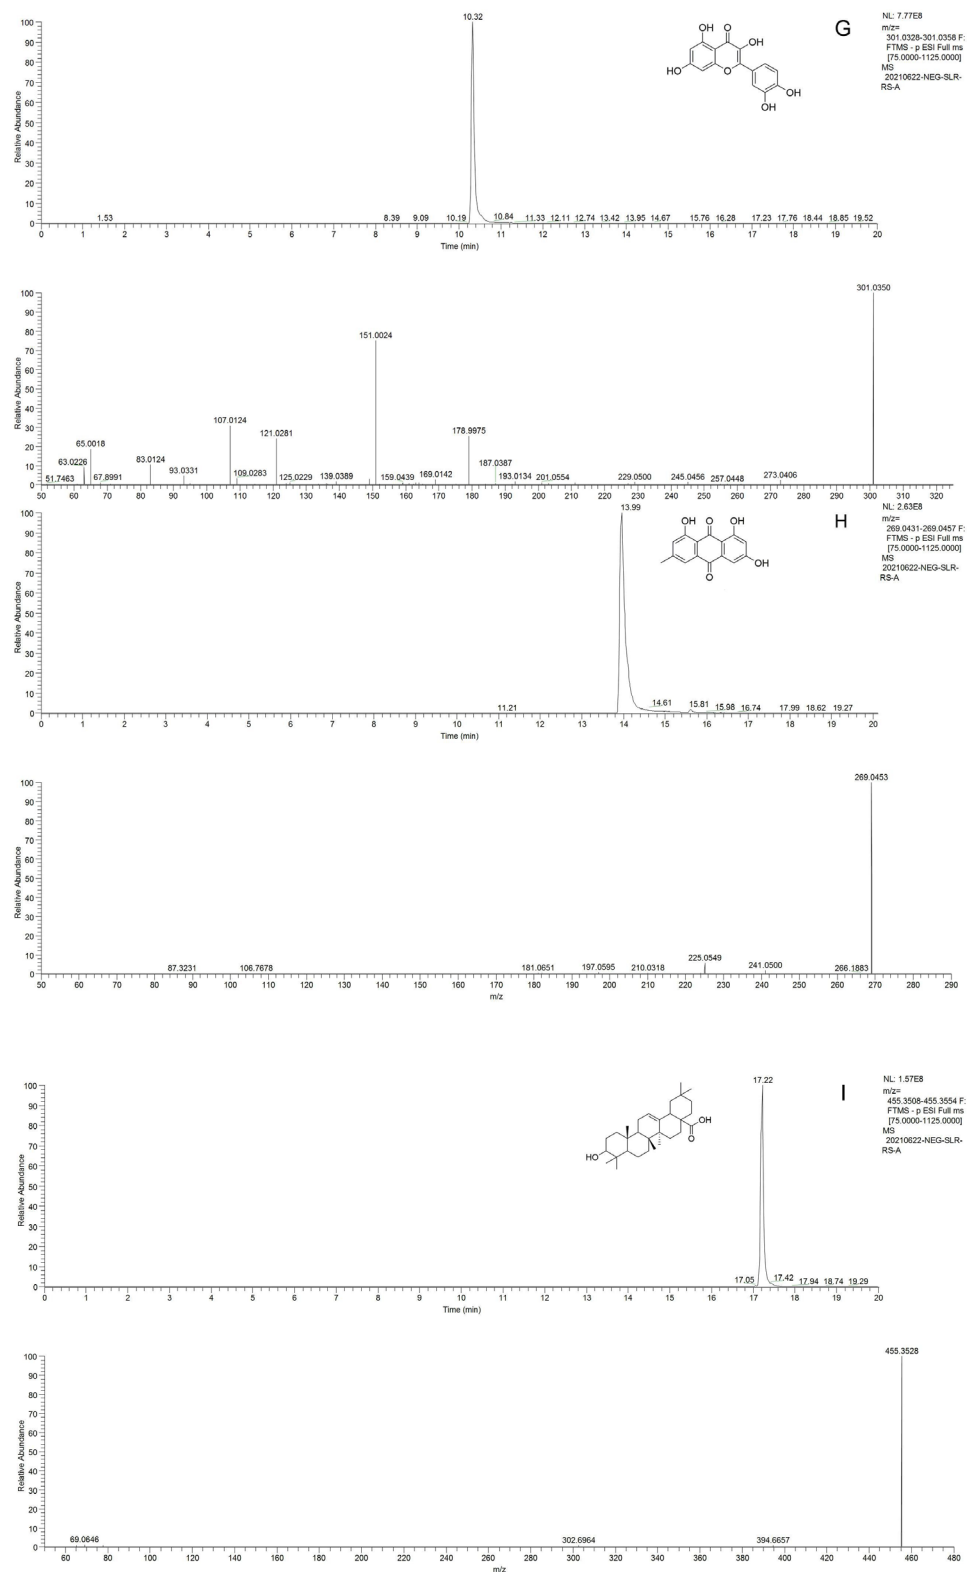

**Figure S2.** Product ion spectra of standard samples of protocatechuic acid (A), aesculetin (B), caffeic acid (C), ferulic acid (D), salicylic acid (E), luteolin (F), quercetin (G), emodin (H) and oleanic acid (I) in negative ionization mode.

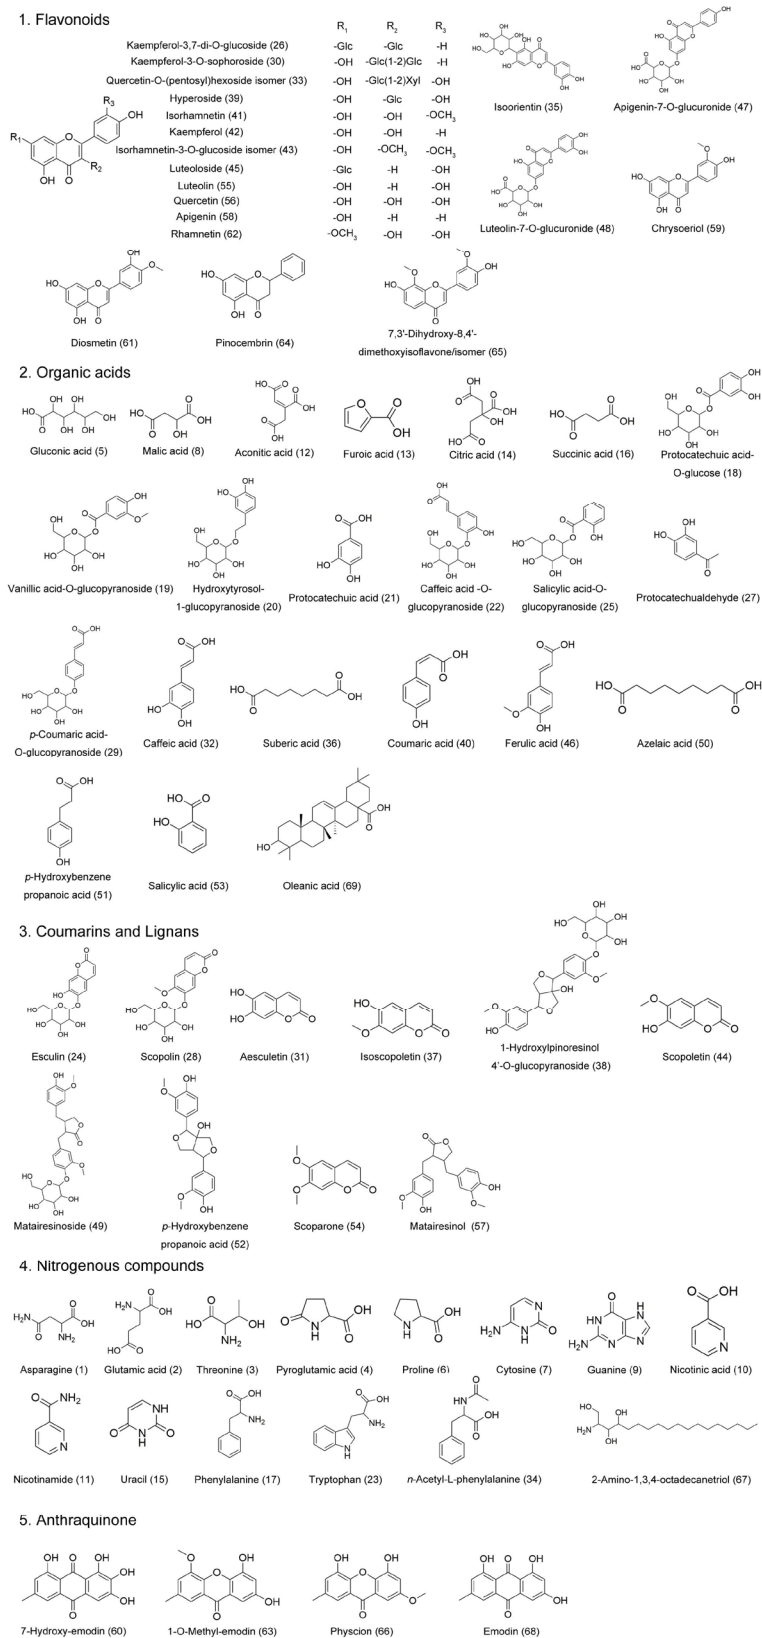

**Figure S3.** Chemical structures of 69 compounds identified in the 80% methanol extract of RS.
